# Supplementary material for: IL‐25 promotes cisplatin resistance of lung cancer cells by activating NF‐κB signaling pathway to increase of major vault protein
Source: PubMed Central journal article supplement (PMC6601590; doi:10.1002/cam4.2213), 2019-05-01
Supplement: CAM4-8-3491-s001.pdf [file CAM4-8-3491-s001.pdf]

A.

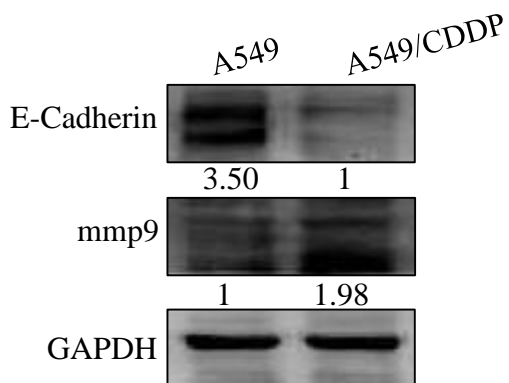

B.

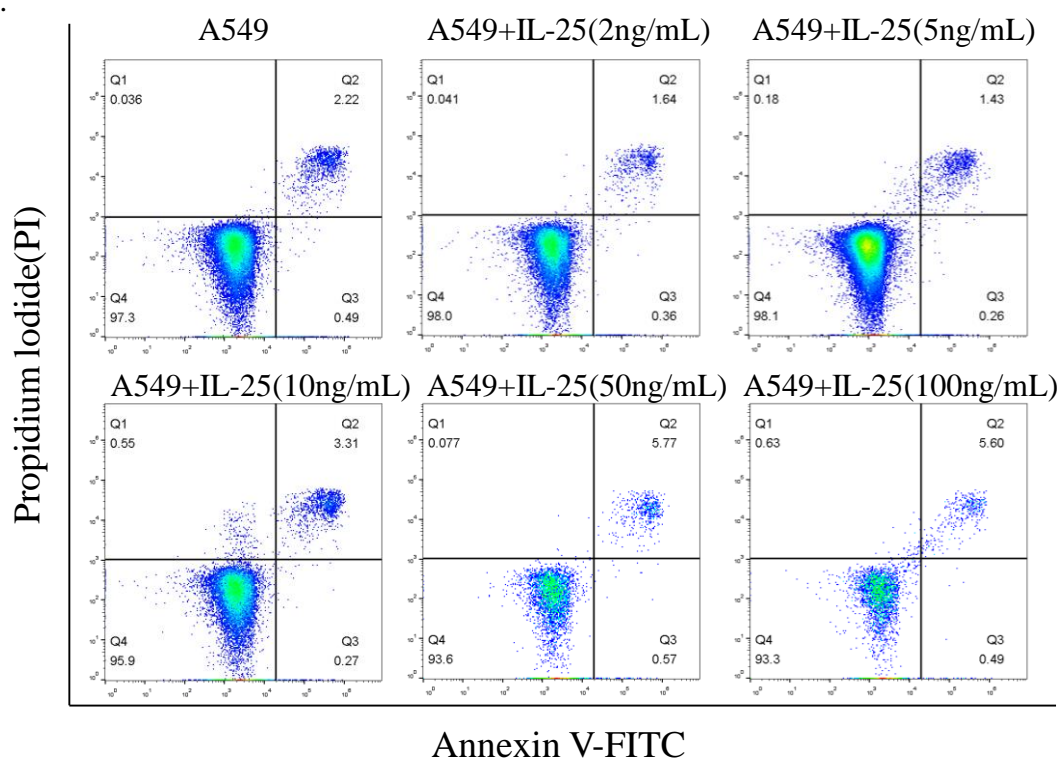

**Figure S1.** (A) the expression of E-cadherin and mmp9 in A549/CDDP cells, parental A549 cells served as control. (B) Flowcytometry analysis the apoptosis ratio in different concentration of exogenous IL-25 treated A549 cells.

Supplementary Figure 2

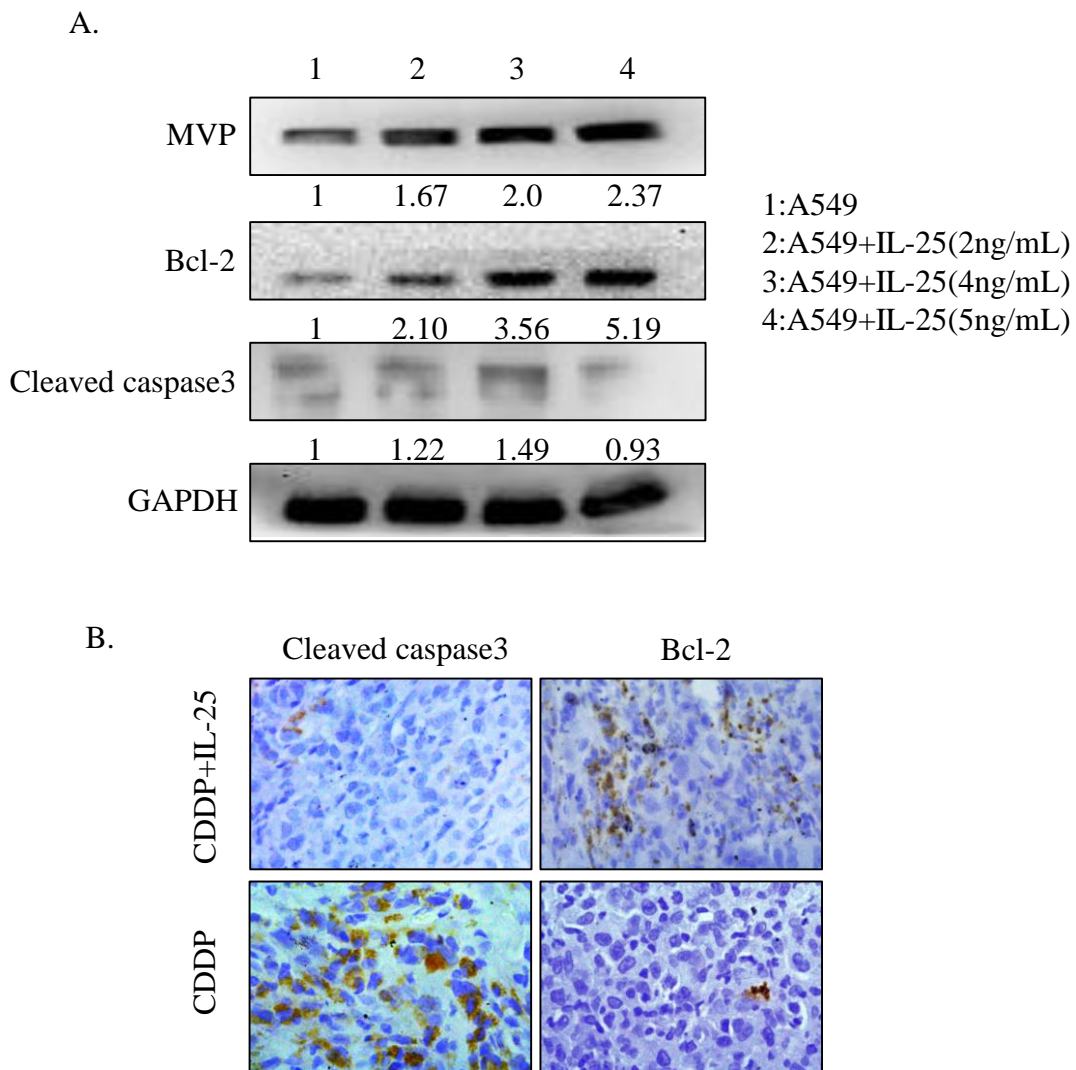

**Figure S2.** (A) The expression of Bcl-2 and cleaved caspase 3 in IL-25 treated A549 cells. (B) Representative microphotographs showing immunohistochemical staining analysis the expression of Bcl-2 and cleaved caspase 3 in tumor tissues (magnification,  $\times 100$ ).
